# Supplementary material for: Deciphering the biology of Cryptophyllachora eurasiatica gen. et sp. nov., an often cryptic pathogen of an allergenic weed, Ambrosia artemisiifolia
Source: PubMed Central journal article supplement (PMC6050288; doi:10.1038/s41598-018-29102-5), 2018-07-17
Supplement: 41598_2018_29102_MOESM1_ESM.pdf [file 41598_2018_29102_MOESM1_ESM.pdf]

## SUPPLEMENTARY MATERIAL

### **Deciphering the biology of *Cryptophyllachora eurasiatica* gen. et sp. nov., an often cryptic pathogen of an allergenic weed, *Ambrosia artemisiifolia***

Levente Kiss<sup>1,2\*</sup>, Gábor M. Kovács<sup>2,3</sup>, Károly Bóka<sup>3</sup>, Gyula Bohár<sup>4</sup>, Krisztina Varga Bohárné<sup>4</sup>, Márk Z. Németh<sup>2</sup>, Susumu Takamatsu<sup>5</sup>, Hyeon-Dong Shin<sup>6</sup>, Vera Hayova<sup>7</sup>, Claudia Nischwitz<sup>8</sup>, Marion K. Seier<sup>9</sup>, Harry C. Evans<sup>9</sup>, Paul Cannon<sup>10</sup>, Gavin James Ash<sup>1</sup>, Roger G. Shivas<sup>1</sup>, and Heinz Müller-Schärer<sup>11</sup>

<sup>1</sup>University of Southern Queensland, Centre for Crop Health, Toowoomba, Qld 4350, Australia

<sup>2</sup>Plant Protection Institute, Centre for Agricultural Research, Hungarian Academy of Sciences (MTA-ATK), Budapest, H-1525, Hungary

<sup>3</sup>Eötvös Loránd University, Institute of Biology, Department of Plant Anatomy, Budapest, H-1117, Hungary

<sup>4</sup>Biovéd 2005 Ltd., Kemenestaródfa, H-9923, Hungary

<sup>5</sup>Mie University, Graduate School of Bioresources, Tsu, 514-8507, Japan

<sup>6</sup>Korea University, Division of Environmental Science and Ecological Engineering, Seoul, 02841, Korea

<sup>7</sup>National Academy of Sciences of Ukraine, M.G. Kholodny Institute of Botany, Kyiv, 01004, Ukraine

<sup>8</sup>Utah State University, Department of Biology, Logan, UT 84322, USA

<sup>9</sup>CABI Europe-UK, Egham, Surrey, TW20 9TY, United Kingdom

<sup>10</sup>Royal Botanic Gardens, Jodrell Laboratory, Mycology Section, Kew, TW9 3AB, United Kingdom

<sup>11</sup>University of Fribourg, Department of Biology/Ecology & Evolution, Fribourg, CH-1700, Switzerland

\*Corresponding author (Email: Levente.Kiss@usq.edu.au)

**This file contains all the supplementary figures (Figs. S1-S5) and supplementary tables (Tables S1-S3) of this work.**

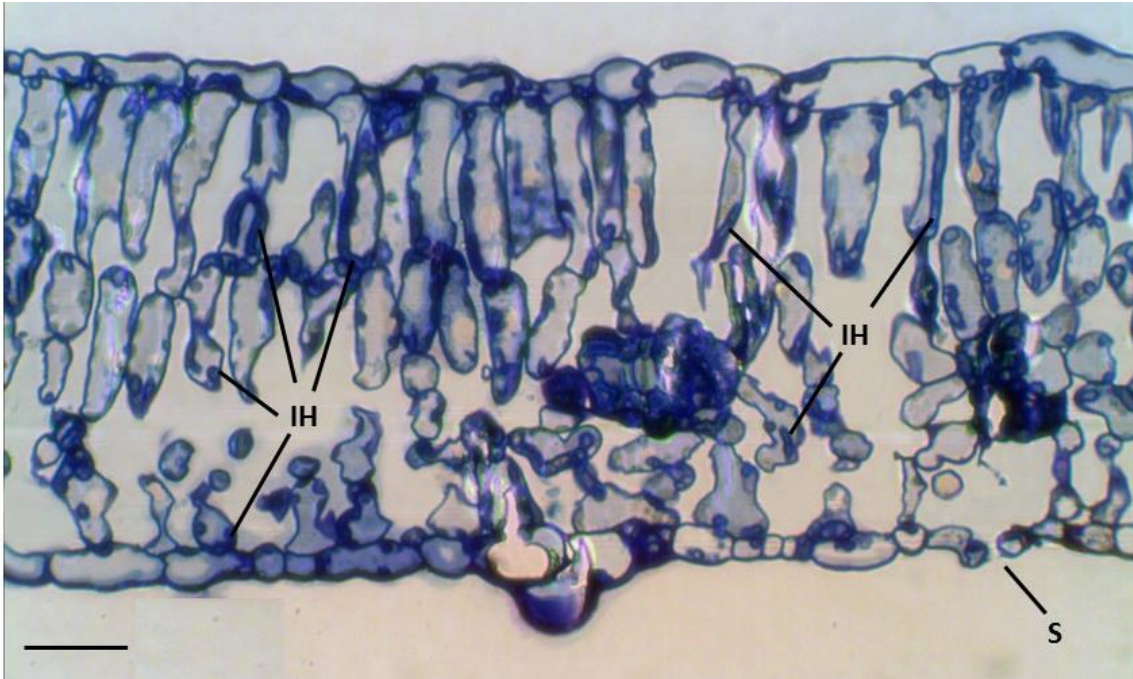

**Supplementary Figure S1.** A semi-thin section of a common ragweed leaf infected with *Cryptophyllachora eurasiatica*, stained with toluidine blue. Intracellular hyphae (IH) are visible in the epidermal cells, as well as in the mesophyll. S = stoma. Bar = 50  $\mu$ m.

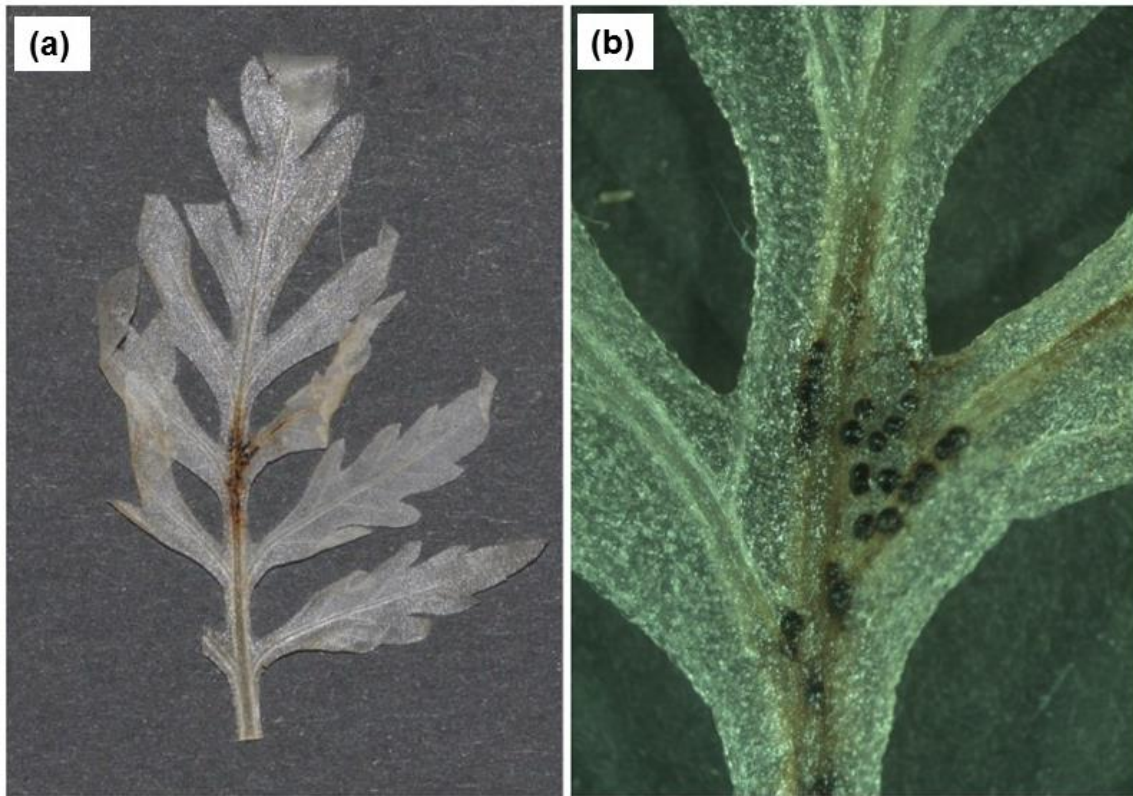

**Supplementary Figure S2.** A leaf of a potted common ragweed plant decolorized in Carnoy's solution one month following artificial inoculation with a *Cryptophyllachora eurasiatica* ascospore suspension. Mature perithecia are visible around the point of inoculation, but not elsewhere. **(a)** The whole leaf. **(b)** A close-up of the leaf surface with perithecia.

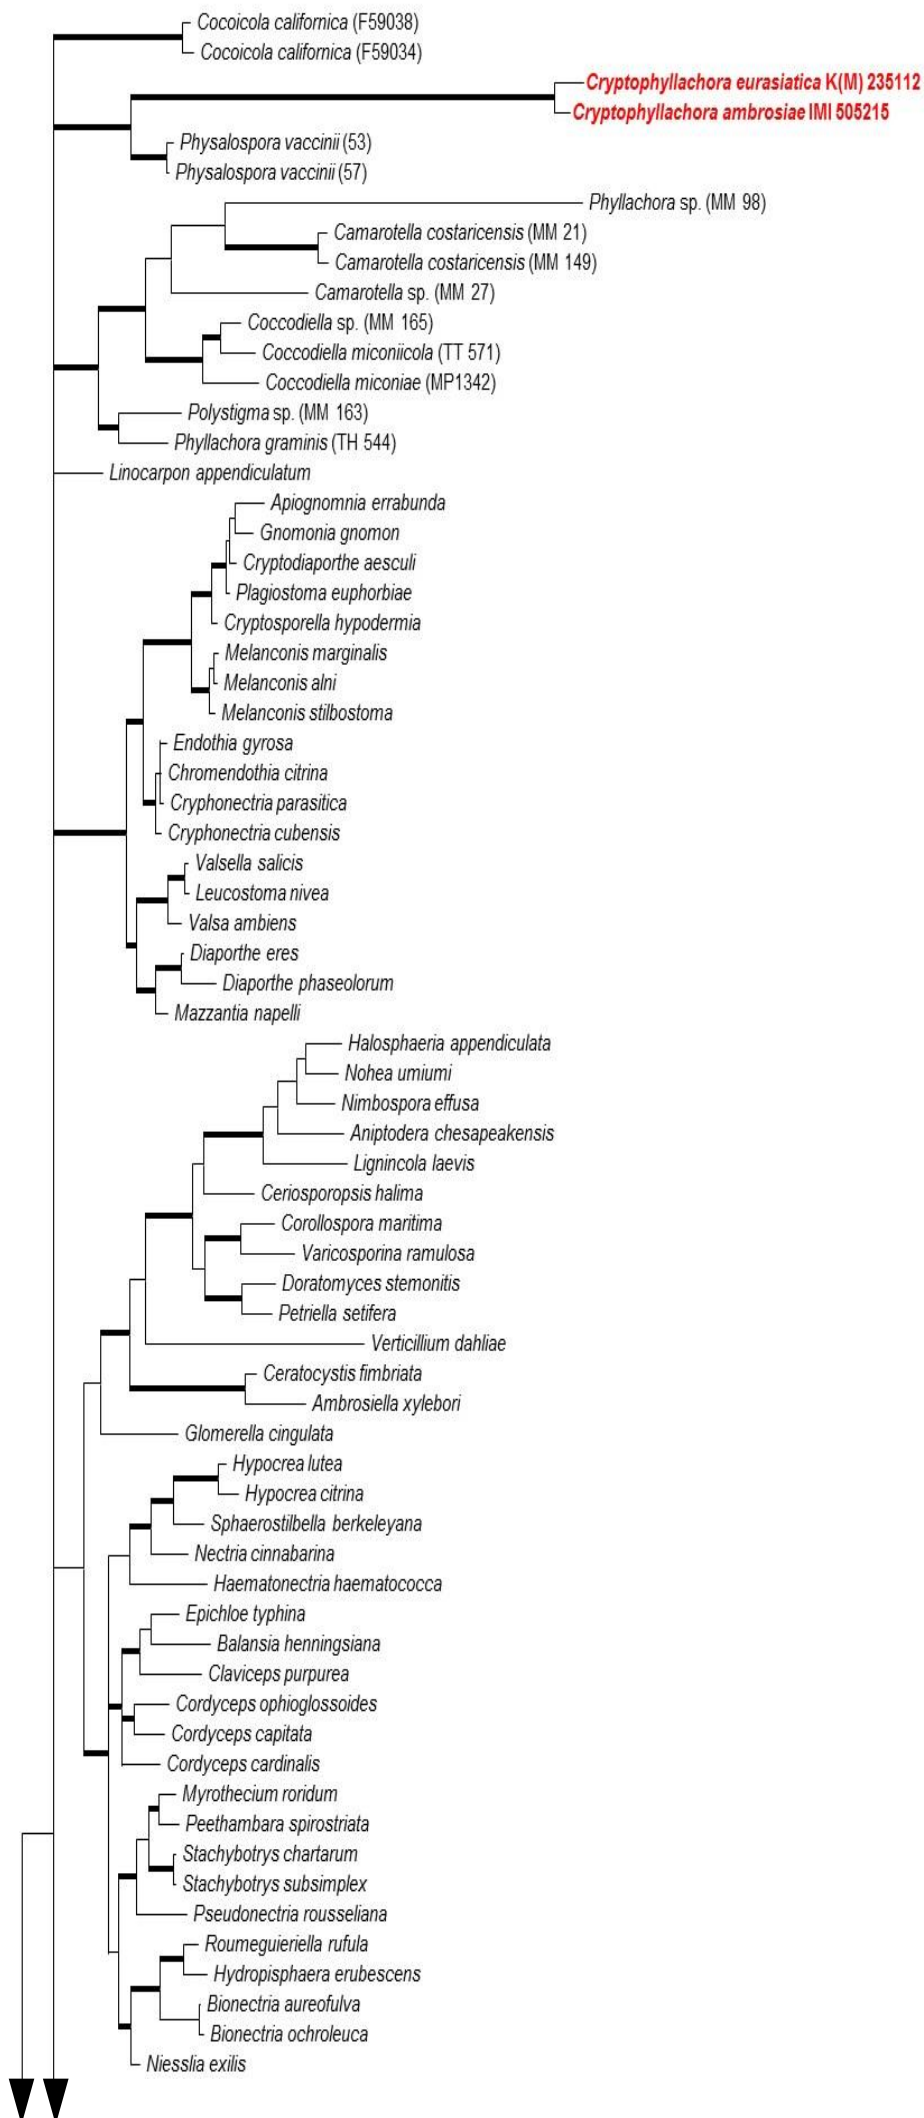

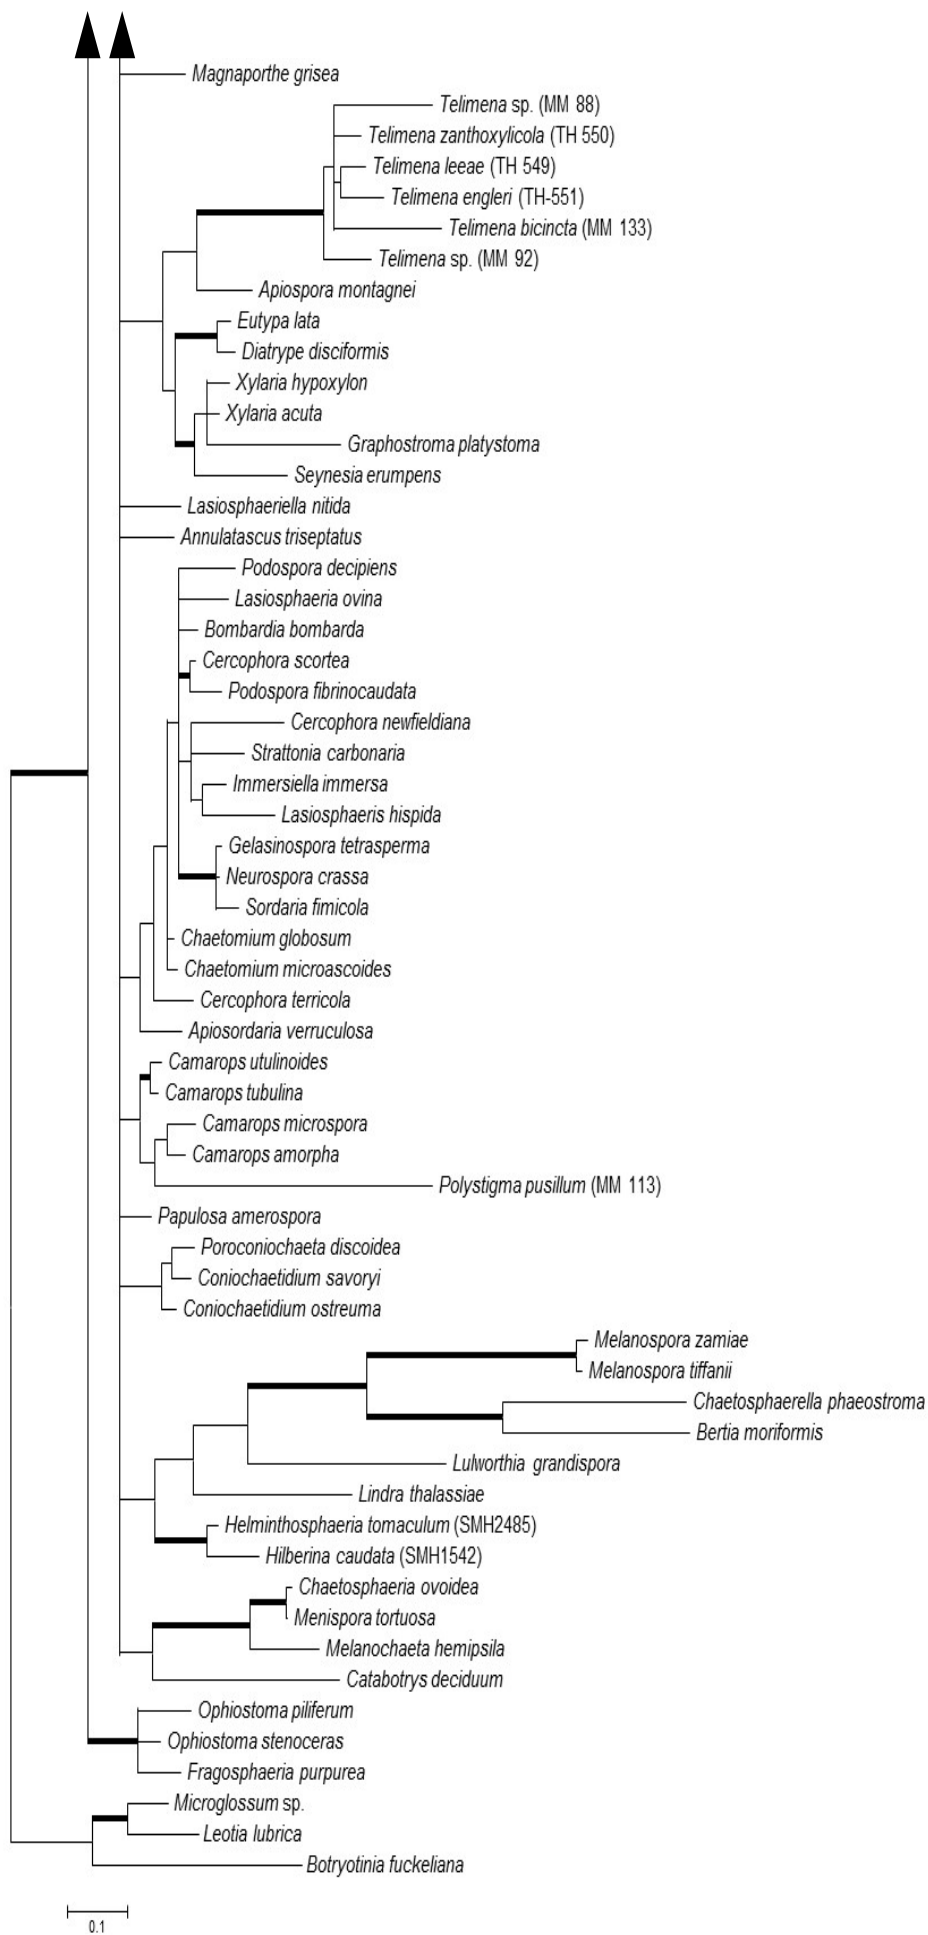

**Supplementary Figure S3.** The majority consensus tree of Bayesian phylogenetic inference of the nrLSU sequences of two *Cryptophyllachora* specimens, K(M) 235112 and IMI 505215, collected in Hungary and the USA, respectively, analyzed together with most of the sequences used by Zhang *et al.* (2006), and included in our analysis of the combined nrLSU and nrSSU dataset (see Fig. 5), and, in addition, with representative nrLSU sequences of the Phyllachorales published recently by Mardones *et al.* (2017). Taxon names follow the original publications. The dataset contained 128 sequences and was 691 characters long. *Botryotinia fuckeliana* served as outgroup in the analyses. Bold branches indicate that Bayesian PP support was equal or higher than 0.9. Bar represents 0.1 expected changes/site/branch.



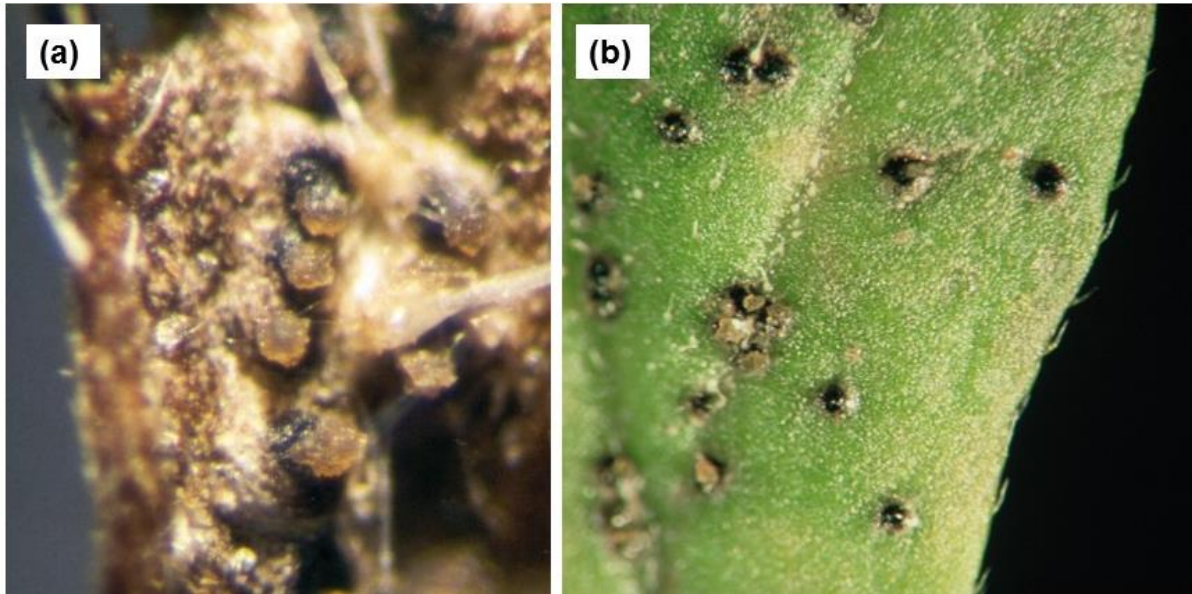

**Supplementary Figure S4.** Ascospore release from *Cryptophyllachora eurasiatica* perithecia. **(a)** Release of ascospores in a brownish mucilaginous material from perithecia found on an already dry, crispy part of a common ragweed plant collected in the field. **(b)** Ascospore release from perithecia produced in a potted plant one month following artificial inoculation with a *C. eurasiatica* ascosporic suspension.

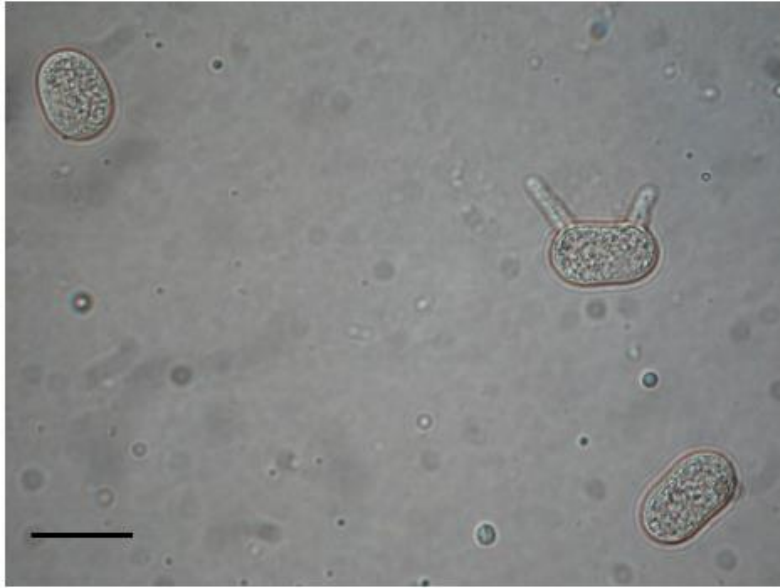

**Supplementary Figure S5.** A germinating, and two non-germinating ascospores of *Cryptophyllum eurasiaticum* following 24 hour incubation of an aqueous ascospore suspension on cellophane placed on water agar. Bar = 15  $\mu\text{m}$ .



**Supplementary Table S1.** Characteristics of the Eurasian field survey sites where *Ambrosia artemisiifolia* populations were monitored for at least five consecutive years for symptoms of fungal diseases.

| Locality              | Habitat description                  | Coordinates          | Duration of field surveys | Number of years when <i>C. eurasiatica</i> was detected / Duration of the survey |
|-----------------------|--------------------------------------|----------------------|---------------------------|----------------------------------------------------------------------------------|
| <b><i>Hungary</i></b> |                                      |                      |                           |                                                                                  |
| Kál                   | Roadside                             | 47.7200,<br>20.2825  | 2004-2008                 | 2/5                                                                              |
| Biatorbágy            | new residential<br>area construction | 47.4789,<br>18.8153  | 2005-2015                 | 3/11                                                                             |
| Etyek                 | roadside                             | 47.4508,<br>18.7481  | 1999-2004                 | 1/6                                                                              |
| Hatvan                | roadside                             | 47.6694,<br>19.6229  | 2003-2007                 | 2/5                                                                              |
| Esztergom             | roadside                             | 47.7324,<br>18.7385  | 2002-2006                 | 1/5                                                                              |
| Kemenestaródfa        | agricultural field                   | 46.9959,<br>16.5252  | 2008-2013                 | 2/6                                                                              |
| Budaörs               | agricultural field                   | 47.4604,<br>18.8947  | 2008-2014                 | 2/7                                                                              |
| <b><i>Korea</i></b>   |                                      |                      |                           |                                                                                  |
| Pocheon               | roadside                             | 37.4517,<br>127.1005 | 1997-2006                 | 1/10                                                                             |

---

|                                |                    |                      |           |      |
|--------------------------------|--------------------|----------------------|-----------|------|
| Seoul                          | roadside           | 37.3503,<br>127.0126 | 1997-2015 | 1/19 |
| <i>Ukraine</i>                 |                    |                      |           |      |
| Dudarkiv,<br>Boryspil district | abandoned field    | 50.4507,<br>30.9642  | 1996-2011 | 8/16 |
| Kiev,<br>Novobilychi           | roadside           | 50.4747,<br>30.3384  | 1997-2008 | 4/12 |
| Baryshivka                     | along railway      | 49.2186,<br>28.5265  | 1996-2005 | 5/10 |
| Baryshivka                     | agricultural field | 50.2745,<br>31.3325  | 2000-2008 | 5/9  |
| Vinnytsia                      | roadside           | 49.2186,<br>28.5265  | 1997-2004 | 6/8  |

---

**Supplementary Table S2.** Designations, place and date of collection and herbarium and NCBI GenBank accession numbers of the *Cryptophyllachora* specimens included in the molecular work.

| Sample designation | Place of collection               | Geographic coordinates | Date of collection  | Herbarium accession number | GenBank accession number<br>ITS/SSU/LSU |
|--------------------|-----------------------------------|------------------------|---------------------|----------------------------|-----------------------------------------|
| Hu-1               | Etyek,<br>Hungary                 | 47.4508,<br>18.7481    | 21 July 1999        | -                          | MH155433/<br>MH155451/<br>MH155469      |
| Hu-2               | Esztergom,<br>Hungary             | 47.7324,<br>18.7385    | 15 August<br>2002   | -                          | MH155434/<br>MH155452/<br>MH155470      |
| Hu-3               | near Hatvan,<br>Hungary           | 47.6694,<br>19.6229    | 9 September<br>2003 | K(M)<br>235112             | MH155435/<br>MH155453/<br>MH155471      |
| Hu-4               | Kál,<br>Hungary                   | 47.7200,<br>20.2825    | 5 October<br>2004   | -                          | MH155436/<br>MH155454/<br>MH155472      |
| Hu-5               | Budapest,<br>Soroksár,<br>Hungary | 47.3976,<br>19.1527    | 18 August<br>2005   | -                          | MH155437/<br>MH155455/<br>MH155473      |
| Hu-6               | Biatorbágy,<br>Hungary            | 47.4789,<br>18.8153    | 8 September<br>2006 | -                          | MH155438/<br>MH155456/<br>MH155474      |
| Hu-7               | Biatorbágy,<br>Hungary            | 47.4789,<br>18.8153    | 5 October<br>2007   | -                          | MH155439/<br>MH155457/<br>MH155475      |

---

|       |                                               |                          |                      |                                               |                                    |
|-------|-----------------------------------------------|--------------------------|----------------------|-----------------------------------------------|------------------------------------|
| Hu-8  | Budaörs,<br>Hungary                           | 47.4604,<br>18.8947      | 2 October<br>2008    | BPI 880510                                    | MH155440/<br>MH155458/<br>MH155476 |
| Ko-1  | Pocheon,<br>Korea                             | 37.4517,<br>127.1005     | 2 Sept 2003          | SMK19592,<br>BPI<br>880505,<br>K(M)<br>235111 | MH155441/<br>MH155459/<br>MH155477 |
| Ko-2  | Seoul,<br>Korea                               | 37.3503,<br>127.0126     | 6 Sept 2003          | SMK19613,<br>BPI 880506                       | MH155442/<br>MH155460/<br>MH155478 |
| Ko-3  | Pyeongchan<br>g, Korea                        | 37.5559,<br>128.4851     | 22 September<br>2016 | -                                             | MH155443/<br>MH155461/<br>MH155479 |
| Ukr-1 | Dudarkiv,<br>Boryspil<br>district,<br>Ukraine | 50.4507,<br>30.9642      | 15 September<br>2005 | BPI<br>880507,<br>K(M)<br>235110              | MH155444/<br>MH155462/<br>MH155480 |
| Ukr-2 | Kyiv,<br>Novobilychi<br>, Ukraine             | 50.4747,<br>30.3384      | 25 September<br>2005 | BPI 880508                                    | MH155445/<br>MH155463/<br>MH155481 |
| US-1  | Trifton, GA,<br>USA                           | 31.477953,<br>-83.440278 | 19 August<br>2005    | BPI 880509                                    | MH155446/<br>MH155464/<br>MH155482 |
| US-2* | Clermont,<br>FL, USA                          | 28.629250,<br>-81.695533 | 3 June 2014          | IMI 505215                                    | MH155447/<br>MH155465/<br>MH155483 |

---

---

|       |                                         |                          |             |            |                                    |
|-------|-----------------------------------------|--------------------------|-------------|------------|------------------------------------|
| US-3* | Clermont,<br>FL, USA                    | 28.629250,<br>-81.695533 | 3 June 2014 | IMI 505215 | MH155448/<br>MH155466/<br>MH155484 |
| US-4* | Clermont,<br>FL, USA                    | 28.629250,<br>-81.695533 | 3 June 2014 | IMI 505215 | MH155449/<br>MH155467/<br>MH155485 |
| US-5  | near<br>Paradise<br>Heights, FL,<br>USA | 28.604817,<br>-81.547417 | 3 June 2014 | IMI 505216 | MH155450/<br>MH155468/<br>MH155486 |

---

\*Different parts of the infected plant material collected in the same place and at the same time were treated as separate samples during the DNA work to reveal any potential genetic diversity in the pathogen.

**Supplementary Table S3.** Accession numbers, host plant species, and place and date of collection of herbarium specimens deposited as *Phyllachora ambrosiae* at U.S. National Fungus Collections (BPI) and examined in this work.

| Herbarium accession number | Host plant species                 | Place of collection               | Date of collection |
|----------------------------|------------------------------------|-----------------------------------|--------------------|
| BPI 636213                 | <i>Ambrosia artemisiifolia</i> (?) | Colombia                          | 24 July 1940       |
| BPI 636214                 | <i>A. artemisiifolia</i> (?)       | Colombia                          | 6 August 1910      |
| BPI 636220                 | <i>A. artemisiifolia</i>           | Tuskegee, AL, USA                 | 7 August 1935      |
| BPI 636221                 | <i>A. artemisiifolia</i>           | Shenandoah National Park, VA, USA | 18 August 1938     |
| BPI 636222                 | <i>A. artemisiifolia</i>           | Woods Hole, MA, USA               | not specified      |
| BPI 636223                 | <i>A. artemisiifolia</i>           | Amery, WI, USA                    | 15 July 1959       |
| BPI 636224                 | <i>A. artemisiifolia</i>           | Pine Bluff, WI, USA               | 9 August 1962      |
| BPI 636225                 | <i>A. artemisiifolia</i>           | Gainesville, FL, USA              | 28 October 1912    |
| BPI 636226                 | <i>A. peruviana</i>                | El Cobre, Venezuela               | 10 September 1932  |
| BPI 636227                 | <i>A. peruviana</i>                | Ibaque, Colombia                  | 20 June 1929       |
| BPI 636228                 | <i>A. peruviana</i>                | Trujillo, Venezuela               | 27 August 1932     |
| BPI 636236                 | <i>A. tenuifolia</i>               | unknown                           | 16 May 1905        |
| BPI 636240                 | <i>A. trifida</i>                  | WI, USA                           | 17 September 1905  |
